# Supplementary material for: Bivalirudin vs. Enoxaparin in Intubated COVID-19 Patients: A Pilot Multicenter Randomized Controlled Trial
Source: MDPI journal article supplement (doi:10.3390/jcm11205992), 2022-10-11
Supplement: s1 [file s1]

# Bivalirudin versus Enoxaparin in Intubated COVID-19 Patients: A Pilot Multicenter Randomized Controlled Trial

Eugenio Garofalo <sup>1</sup>, Gianmaria Cammarota <sup>2</sup>; Giuseppe Neri <sup>1</sup>; Sebastiano Macheda <sup>3</sup>, Eugenio Biamonte <sup>1</sup>, Pino Pasqua <sup>4</sup>; Maria Laura Guzzo <sup>5</sup>, Federico Longhini <sup>1,\*</sup> and Andrea Bruni <sup>1</sup> on behalf of the BivaCOVID authors

<sup>1</sup> Anesthesia and Intensive Care, Department of Medical and Surgical Sciences, "Magna Graecia" University, 88100 Catanzaro, Italy

<sup>2</sup> Department of Anesthesia and Intensive Care Medicine, University of Perugia, 06121, Perugia, Italy

<sup>3</sup> Anesthesia and Intensive Care Unit, Grande Ospedale Metropolitano, 89121 Reggio Calabria, Italy;

<sup>4</sup> Anesthesia and Intensive Care Unit, Annunziata Hospital, 87100, Cosenza, Italy

<sup>5</sup> Anesthesia and Intensive Care Unit, "Pugliese Ciaccio" Hospital, 88100, Catanzaro, Italy

\* Correspondence: longhini.federico@gmail.com; Tel.: +39-34-7539-5967

## Electronic Supplemental Material

**Table S1. Clinical characteristics at day 3 from randomization**

|                                    | Bivalirudin<br>(n=29) | Enoxaparin<br>(n=29) | P value |
|------------------------------------|-----------------------|----------------------|---------|
| <i>Hemodynamic</i>                 |                       |                      |         |
| Need for norepinephrine - n (%)    | 14 (48%)              | 15 (52%)             | 0.793   |
| Norepinephrine (mcg*kg/min)        | 0.30 [0.20; 0.45]     | 0.30 [0.20; 0.50]    | 0.738   |
|                                    |                       |                      |         |
| <b>Mechanical ventilation</b>      |                       |                      |         |
| Volume controlled - n (%)          | 14 (48%)              | 19 (66%)             | 0.289   |
| Pressure support - n (%)           | 15 (52%)              | 10 (34%)             |         |
|                                    |                       |                      |         |
| <i>Arterial Blood Gases</i>        |                       |                      |         |
| pH                                 | 7.39 [7.37; 7.41]     | 7.38 [7.37; 7.41]    | 0.814   |
| PaCO <sub>2</sub> (mmHg)           | 41.0 [38.3; 42.3]     | 41.2 [37.9; 42.4]    | 0.797   |
| PaO <sub>2</sub> /FiO <sub>2</sub> | 144 [124; 193]        | 150 [130; 186]       | 0.834   |
| HCO <sub>3</sub> (mMol/L)          | 24.3 [23.0; 25.2]     | 24.6 [23.8; 25.5]    | 0.669   |
| Lac (mMol/L)                       | 1.7 [0.9; 2.7]        | 1.5 [0.8; 3.7]       | 0.785   |
| <i>Blood tests</i>                 |                       |                      |         |
| Platelets count                    | 231 [170; 297]        | 245 [161; 307]       | 0.549   |
| aPTT                               | 60 [58; 63]           | 35 [32; 37]          | <0.001  |
| PT                                 | 12 [12; 13]           | 12 [12; 13]          | 0.121   |
| PT-INR                             | 1.15 [1.08; 1.21]     | 1.13 [1.09; 1.19]    | 0.737   |
| D-dimer                            | 8.13 [5.95; 12.29]    | 7.98 [5.67; 12.84]   | 0.911   |
| Fibrinogen                         | 412 [360; 552]        | 498 [416; 634]       | 0.063   |

|                    |                    |                    |       |
|--------------------|--------------------|--------------------|-------|
| Procalcitonin      | 6.54 [3.33; 19.57] | 6.47 [1.95; 16.39] | 0.544 |
| C-Reactive Protein | 98.4 [37.9; 176.6] | 67.5 [27.8; 148.7] | 0.635 |

**Table S2. Clinical characteristics at day 7 from randomization**

|                                    | Bivalirudin<br>(n=27) | Enoxaparin<br>(n=28) | P value |
|------------------------------------|-----------------------|----------------------|---------|
| <b>Hemodynamic</b>                 |                       |                      |         |
| Need for norepinephrine - n (%)    | 8 (30%)               | 11 (39%)             | 0.567   |
| Norepinephrine (mcg*kg/min)        | 0.40 [0.20; 0.58]     | 0.50 [0.20; 0.60]    | 0.671   |
|                                    |                       |                      |         |
| <b>Mechanical ventilation</b>      |                       |                      |         |
| Volume controlled - n (%)          | 4 (15%)               | 9 (32%)              | 0.177   |
| Pressure Support - n (%)           | 18 (67%)              | 17 (61%)             |         |
| Non-Invasive Ventilation - n (%)   | 2 (7%)                | 2 (7%)               |         |
| High-Flow Nasal Cannula - n (%)    | 3 (11%)               | 0 (0%)               |         |
|                                    |                       |                      |         |
| <b>Arterial Blood Gases</b>        |                       |                      |         |
| pH                                 | 7.39 [7.38; 7.40]     | 7.39 [7.38; 7.40]    | 0.404   |
| PaCO <sub>2</sub> (mmHg)           | 39.6 [38.8; 42.1]     | 40.1 [38.2; 42.3]    | 0.500   |
| PaO <sub>2</sub> /FiO <sub>2</sub> | 205 [160; 246]        | 174 [139; 194]       | 0.033   |
| HCO <sub>3</sub> (mMol/L)          | 23.8 [23.4; 24.6]     | 24.2 [23.7; 25.1]    | 0.221   |
| Lac (mMol/L)                       | 0.9 [0.7; 1.8]        | 1.4 [0.9; 2.0]       | 0.192   |
| <b>Blood tests</b>                 |                       |                      |         |
| Platelets count                    | 217 [187; 287]        | 246 [212; 286]       | 0.359   |
| aPTT                               | 63 [59; 66]           | 31 [30; 35]          | <0.001  |
| PT                                 | 12 [12; 13]           | 12 [12; 13]          | 0.512   |
| PT-INR                             | 1.15 [1.12; 1.21]     | 1.13 [1.06; 1.21]    | 0.171   |
| D-dimer                            | 6.43 [4.12; 8.65]     | 7.84 [4.35; 11.90]   | 0.222   |
| Fibrinogen                         | 427 [387; 522]        | 471 [391; 568]       | 0.325   |
| Procalcitonin                      | 4.23 [2.12; 10.54]    | 6.04 [2.93; 20.67]   | 0.368   |
| C-Reactive Protein                 | 31.2 [18.4; 68.9]     | 41.6 [21.2; 96.9]    | 0.723   |

**Table S3. Clinical characteristics at day 15 from randomization**

|                                 | <b>Bivalirudin<br/>(n=9)</b> | <b>Enoxaparin<br/>(n=18)</b> | <b>P value</b> |
|---------------------------------|------------------------------|------------------------------|----------------|
| <b>Hemodynamic</b>              |                              |                              |                |
| Need for norepinephrine - n (%) | 1 (11%)                      | 7 (39%)                      | 0.201          |
| Norepinephrine (mcg*kg/min)     | 0.80 [0.80; 0.80]            | 0.70 [0.60; 0.80]            | 0.750          |
| <b>Mechanical ventilation</b>   |                              |                              |                |

|                                    |                   |                    |        |
|------------------------------------|-------------------|--------------------|--------|
| Volume controlled - n (%)          | 1 (11%)           | 7 (39%)            | 0.209  |
| Pressure Support - n (%)           | 0 (0%)            | 1 (6%)             |        |
| Non-Invasive Ventilation - n (%)   | 1 (11%)           | 0 (0%)             |        |
| High-Flow Nasal Cannula - n (%)    | 7 (78%)           | 10 (55%)           |        |
|                                    |                   |                    |        |
| <i>Arterial Blood Gases</i>        |                   |                    |        |
| pH                                 | 7.40 [7.38; 7.42] | 7.38 [7.34; 7.42]  | 0.385  |
| PaCO <sub>2</sub> (mmHg)           | 39.4 [35.3; 41.7] | 37.3 [36.2; 39.0]  | 0.520  |
| PaO <sub>2</sub> /FiO <sub>2</sub> | 293 [229; 315]    | 226 [118; 280]     | 0.045  |
| HCO <sub>3</sub> (mMol/L)          | 24.6 [23.4; 25.0] | 23.9 [22.6; 24.5]  | 0.554  |
| Lac (mMol/L)                       | 0.70 [0.55; 1.10] | 0.85 [0.70; 5.60]  | 0.147  |
| <i>Blood tests</i>                 |                   |                    |        |
| Platelets count                    | 251 [184; 273]    | 263 [137; 325]     | 0.625  |
| aPTT                               | 59 [58; 62]       | 35 [33; 38]        | <0.001 |
| PT                                 | 13 [12; 14]       | 12 [12; 14]        | 0.303  |
| PT-INR                             | 1.16 [1.15; 1.28] | 1.13 [1.10; 1.21]  | 0.226  |
| D-dimer                            | 3.78 [2.84; 7.99] | 8.95 [3.85; 13.66] | 0.111  |
| Fibrinogen                         | 401 [335; 453]    | 459 [375; 505]     | 0.227  |
| Procalcitonin                      | 5.12 [0.53; 6.67] | 2.49 [1.13; 19.14] | 0.938  |
| C-Reactive Protein                 | 23.8 [13.5; 42.3] | 37.9 [21.4; 210.1] | 0.208  |
